# Supplementary material for: Unusual N-Prenylation in Diazepinomicin Biosynthesis: The Farnesylation of a Benzodiazepine Substrate Is Catalyzed by a New Member of the ABBA Prenyltransferase Superfamily
Source: PLOS journal article supplement (doi:10.1371/journal.pone.0085707), 2013-12-23
Supplement: S1 (10.1371/journal.pone.0085707.s001) [file journal.pone.0085707.s001]

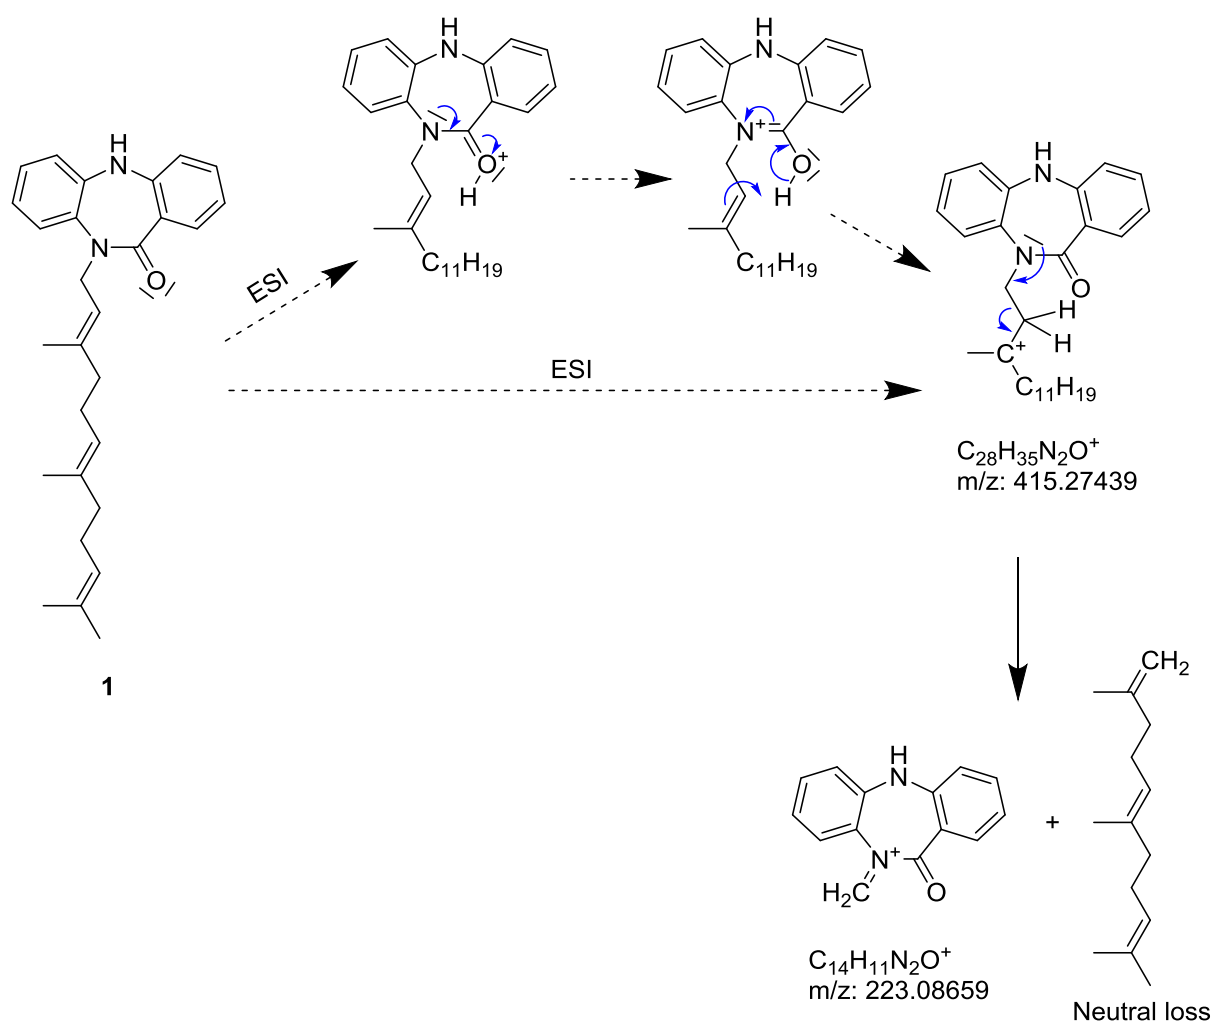

Figure S1. Potential protonation and proposed MS fragmentation mechanism of the product formed under catalysis of DzmP from dibenzodiazepinone and FPP, 5,10-dihydro-10-[(2*E*,6*E*)-3,7,11-trimethyl-2,6,10-dodecatrienyl]-11*H*-dibenzo[*b,e*][1,4]diazepin-11-one (**1**).
