# Supplementary material for: Unusual N-Prenylation in Diazepinomicin Biosynthesis: The Farnesylation of a Benzodiazepine Substrate Is Catalyzed by a New Member of the ABBA Prenyltransferase Superfamily
Source: PLOS journal article supplement (doi:10.1371/journal.pone.0085707), 2013-12-23
Supplement: S2 (10.1371/journal.pone.0085707.s002) [file journal.pone.0085707.s002]

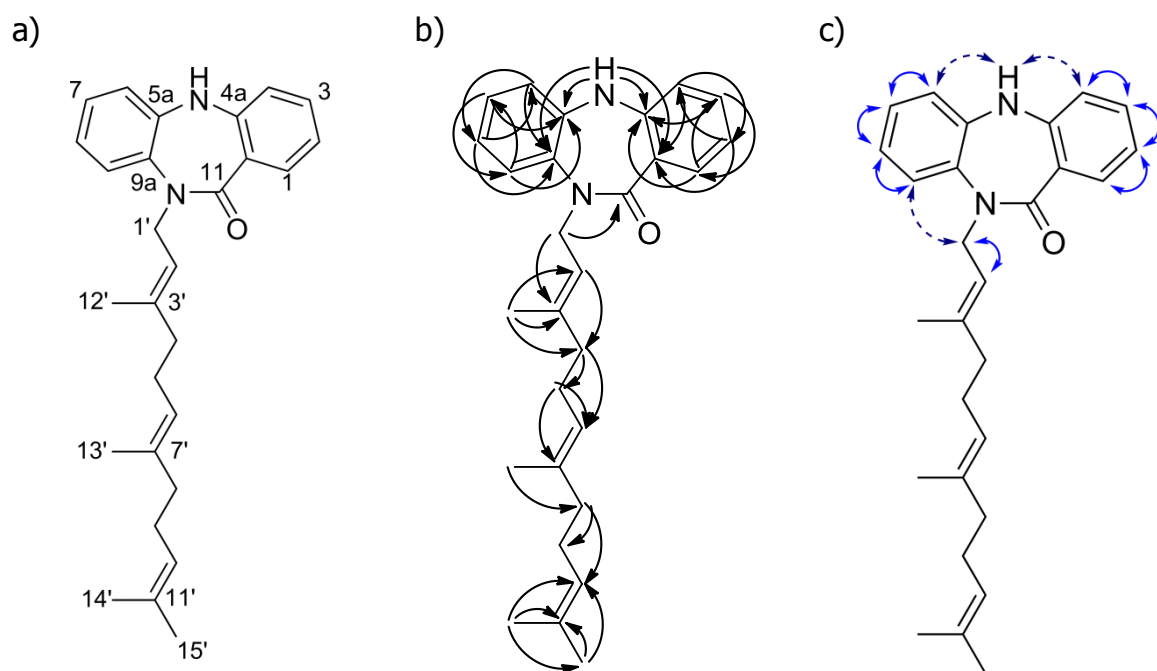

Figure S2. NMR correlations of the farnesylated dibenzodiazepinone **1**. a) Numbering of atoms; b) selected  $^1\text{H}$  HMBC correlations and c) selected  $^1\text{H}$ - $^1\text{H}$  COSY (solid arrows) and NOESY (dashed arrows) correlations.
