# Supplementary material for: Unusual N-Prenylation in Diazepinomicin Biosynthesis: The Farnesylation of a Benzodiazepine Substrate Is Catalyzed by a New Member of the ABBA Prenyltransferase Superfamily
Source: PLOS journal article supplement (doi:10.1371/journal.pone.0085707), 2013-12-23
Supplement: S3 (10.1371/journal.pone.0085707.s003) [file journal.pone.0085707.s003]

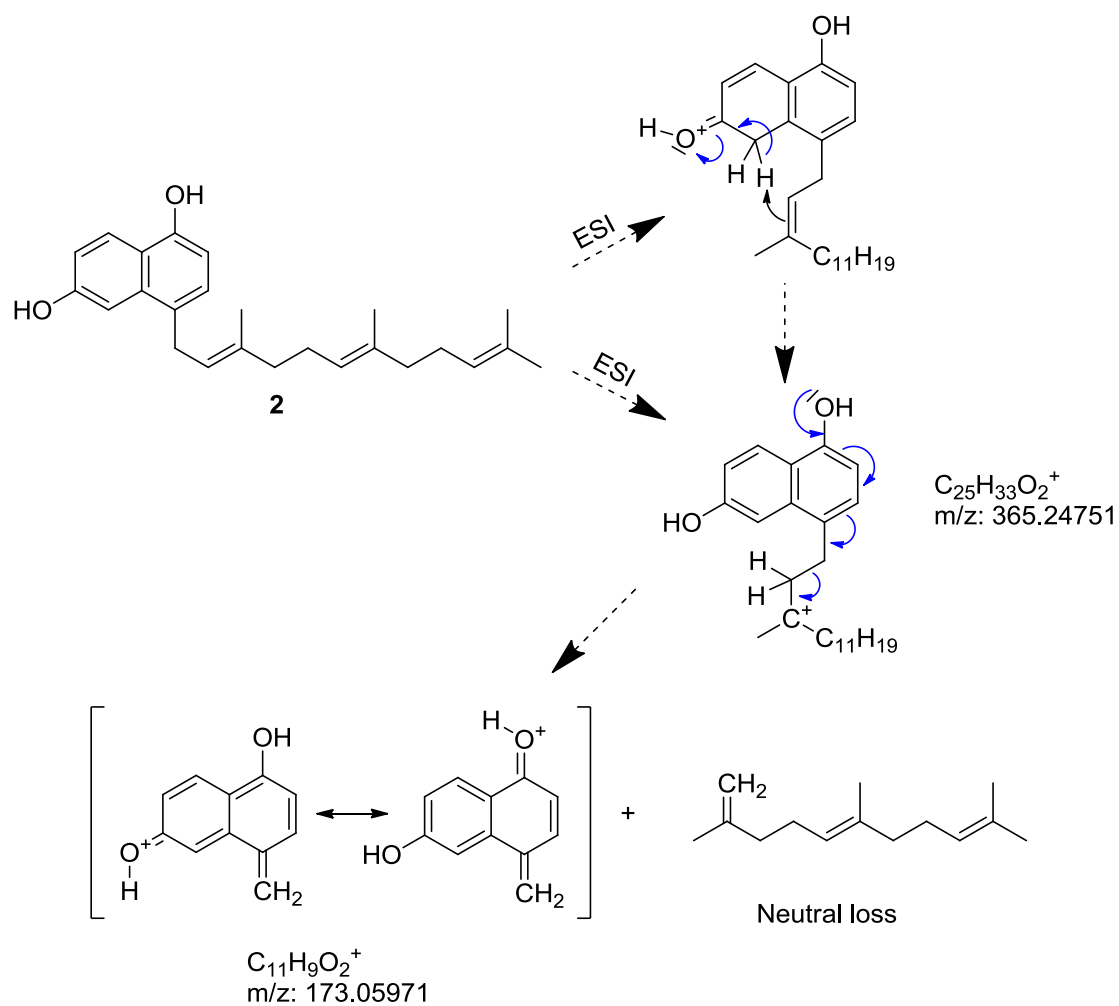

Figure S3. Potential protonation and proposed MS fragmentation mechanism of the product formed under catalysis of DzmP from 1,6-DHN and FPP, 4-[(2*E*,6*E*)-3,7,11-trimethyl-2,6,10-dodecatrienyl]-naphthalene-1,6-diol (**2**).
