# Supplementary material for: Unusual N-Prenylation in Diazepinomicin Biosynthesis: The Farnesylation of a Benzodiazepine Substrate Is Catalyzed by a New Member of the ABBA Prenyltransferase Superfamily
Source: PLOS journal article supplement (doi:10.1371/journal.pone.0085707), 2013-12-23
Supplement: S6 (10.1371/journal.pone.0085707.s006) [file journal.pone.0085707.s006]

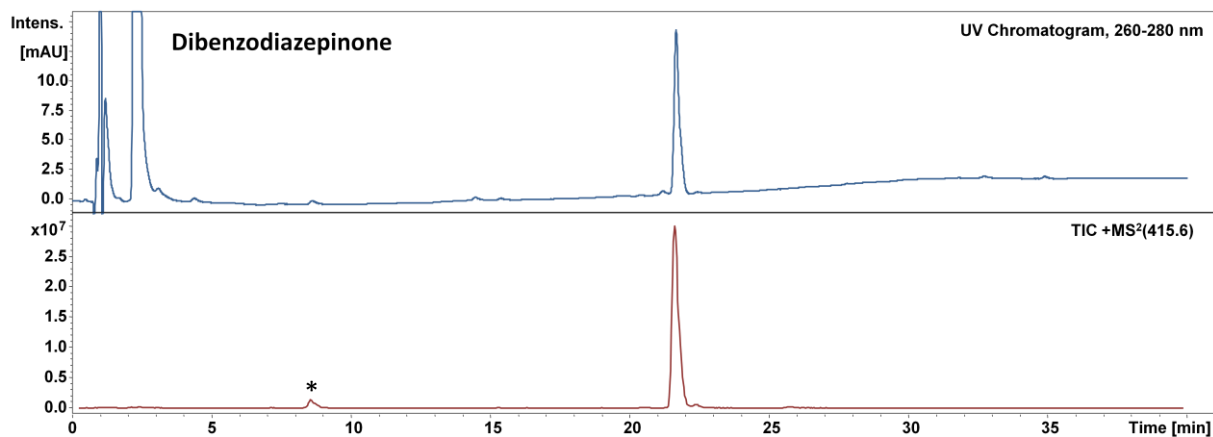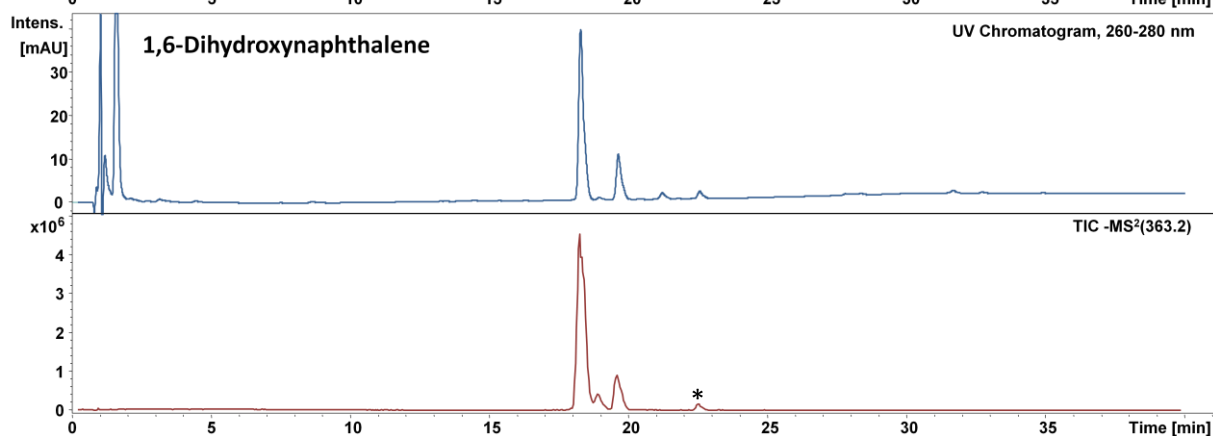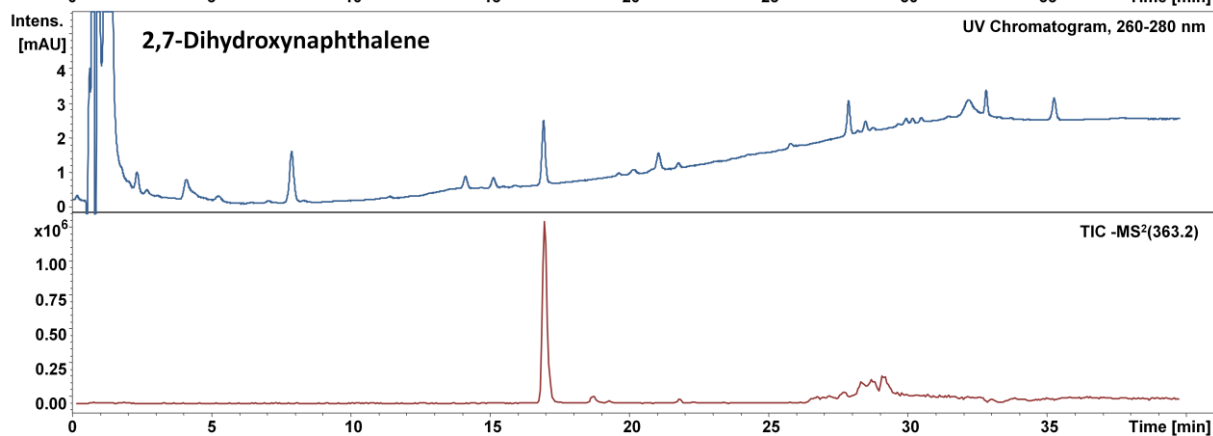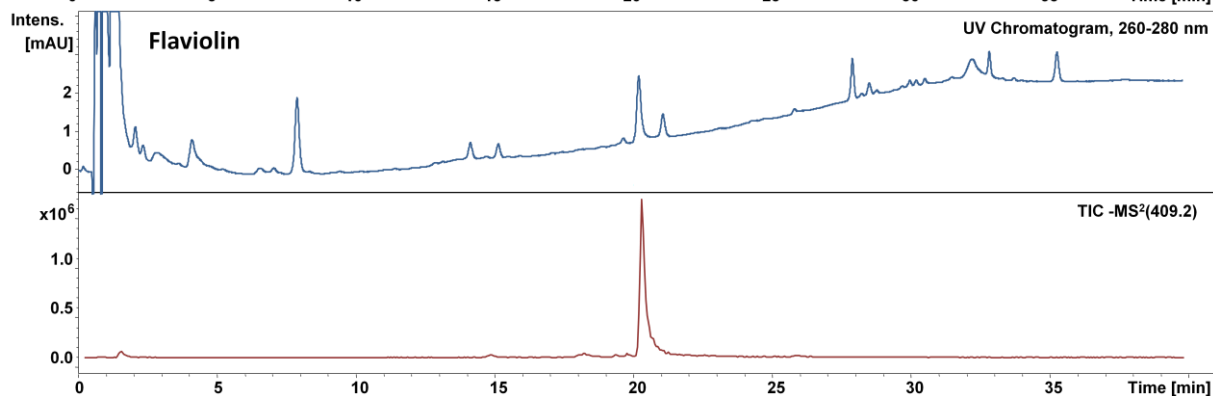

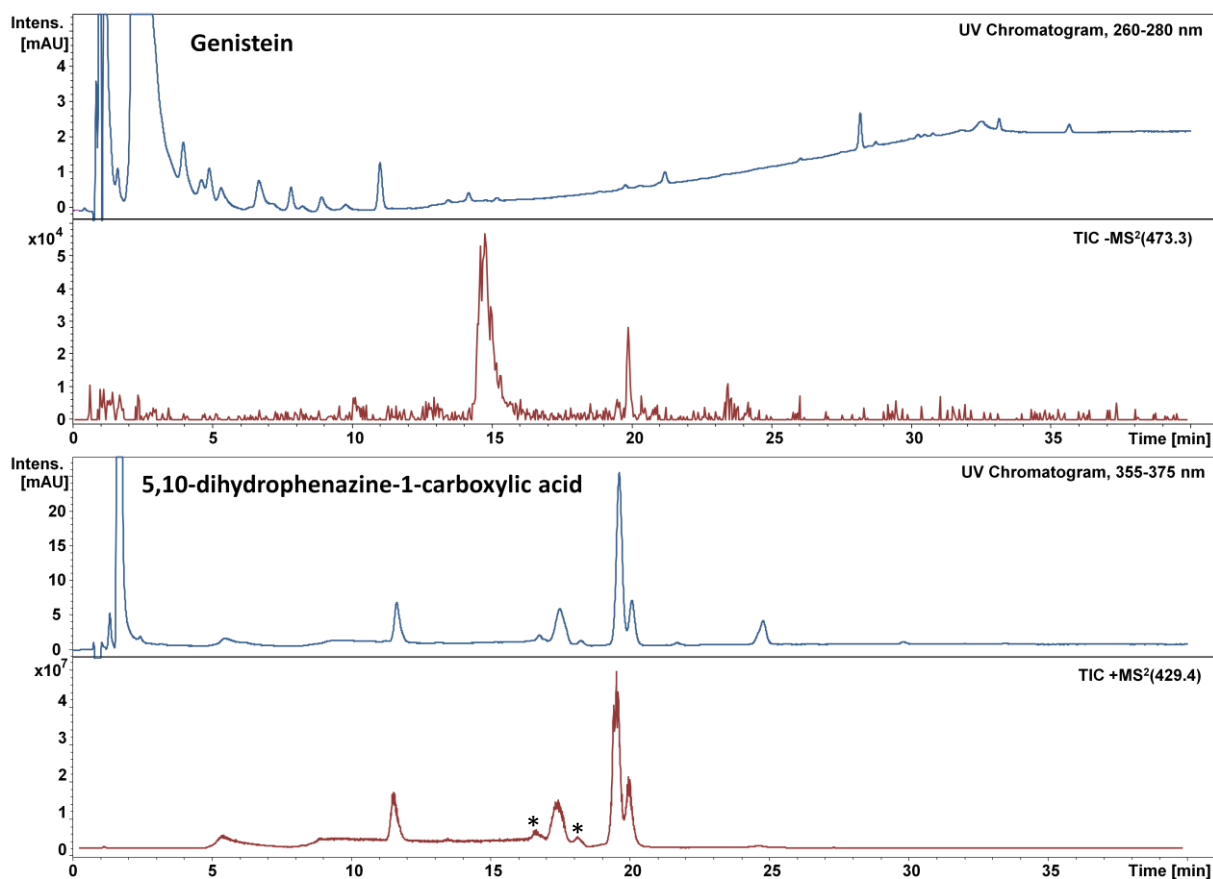

Figure S6. HPLC-MS chromatograms of the incubation of different aromatic substrates with FPP and DzmP. Blue line, HPLC-UV absorbance; brown line, intensity of total ion count (TIC) from MS-MS experiment of the respective mass of the proposed product; asterisks, peaks showing the mass as the proposed product, but not the same fragmentation pattern.
